# 1 **Amputation in Kingdom of Saudi Arabia: Etiology, Characteristics and** 2 **Clinical status from a Large Tertiary Rehabilitation Center**

3 Enas M. Shahine<sup>1</sup>, Mohamed T. Silarbi<sup>1</sup>, Abdullah Alzeer<sup>2</sup>, Mostafa Bukhamseen<sup>3</sup>, Khalid  
4 Mohammed Alzaraa<sup>4</sup>, Iram Saba<sup>5\*</sup>

5 1 Medical Affairs, Sultan Bin Abdulaziz Humanitarian City, Riyadh, Saudi Arabia

6 2 Specialized Center of Prosthetics and Orthotics, Sultan Bin Abdulaziz Rehabilitation Center  
7 Riyadh, Riyadh, Saudi Arabia

8 3 Rehab Program & Services, Sultan Bin Abdulaziz Rehabilitation Center Riyadh, Riyadh, Saudi  
9 Arabia

10 4 Pediatrics, Sultan Bin Abdulaziz Humanitarian City, Riyadh, Saudi Arabia

11 5 Research and Scientific Center, Sultan Bin Abdulaziz Humanitarian City, Riyadh, Saudi  
12 Arabia

13 \*Corresponding author: Iram Saba, Research and Scientific Center Sultan Bin Abdulaziz  
14 Humanitarian City, Riyadh, Saudi Arabia, iramsabawani@gmail.com

## 15 **Abstract**

16 **Introduction:** Limb amputation significantly impacts the patient's physical, emotional, and  
17 social life. Multiple etiological factors may lead to limb amputation. Unfortunately, there is  
18 limited data about amputation in Saudi Arabia. Since Sultan Bin Abdulaziz Humanitarian City  
19 (SBAHC) is a tertiary centre receiving such patients, we collected data from ten years to look at  
20 the etiology, characteristics, and clinical impact of amputations in the Kingdom.

21 **Methods:** A retrospective study of 1409 amputee patients' data at SBAHC collected over ten  
22 years included demographic variables, etiology, site, level, and type of amputation. We also  
23 collected Functional independent measurement (FIM) scores for 618 patients.

24 **Result:** Males constitute the majority of amputees (75.7%) and the average age in males was  
25 higher in males compared to females (45 vs 36 years respectively,  $p < 0.001$ ). Vascular diseases  
26 (42.3%) and Trauma (36.8%) were the leading cause of amputation in this cohort. Diabetes  
27 mellitus was the most frequent comorbidity (40.5%), followed by hypertension (26.2%). Trans-  
28 tibial amputations were the most typical (22.58%), followed by trans-femoral amputation  
29 (14.12%). Traumatic trans-femoral amputation was more prevalent among young adults than  
30 traumatic trans-tibial amputation. Trauma-related amputation cases were highest in the age group of  
31 21-30 years (69.2%), while vascular related amputations were highest in the age group of 70 and above  
32 years (89.5%). FIM scores improved significantly in locomotion (33.6%) followed by transfer  
33 (30.6%) and self-care (16.4%) at six-month post discharge compared to admission (all  $p$ -  
34 values  $< 0.01$ ).

35 **Conclusion:** Vascular pathology arising due to chronic diseases is the primary risk factor that  
36 may lead to amputation and warrant primary and secondary prevention programs. Seatbelt  
37 enforcement can significantly decrease amputation related to Road Traffic Accidents, which has  
38 been the second most familiar cause of amputation.

39 **Keywords:** Amputation, Rehabilitation, Saudi Arabia, Functional independent measurement,  
40 Trauma, Vascular

## 41 **Introduction**

42 Amputation has a profound and long-lasting impact on an individual's economic, psychological,  
43 and social status, and the prevalence of amputations performed has been rising worldwide [1].  
44 Lower limb loss was estimated to affect 1.6 million people in the United States in 2005, with that  
45 figure expected to more than double to 3.6 million by 2050 [2]. Complications arising from  
46 various peripheral vascular diseases and/or diabetes form the most important causes of  
47 amputations. However, extremity traumas and, to a lesser extent, cancer and other etiologies also  
48 contribute [3]. Studies have shown that age and gender, and etiology play a significant role in the  
49 pattern of limb loss. Limb loss is more common in people with comorbidities, young and men  
50 [4]. Most patients requiring prosthetic restoration and rehabilitation services are older adults who  
51 have had lower limb amputations due to vascular disease [5]. The lifetime risk of amputation in  
52 the elderly is 10–15%, 10–30 times higher than in the general population. The data also shows  
53 that Trauma and cancer-related amputations are decreasing, while congenital amputations remain  
54 stable. Studies show that diabetes is responsible for at least half of non-traumatic lower-limb  
55 amputations worldwide [6]. The studies regarding amputation among countries in Asia have  
56 many similarities, as trauma and disease incidence occur in similar patterns. In contrast, the  
57 patterns differ from those in the United States, Denmark, Finland, and Australia [7], where  
58 peripheral vascular diseases, particularly arteriosclerosis, are the most common cause of  
59 amputation.

60 The incidence rate of peripheral vascular diseases, diabetes, and road traffic accident-toll in  
61 Saudi Arabia are also on the rise [8, 9]. Consequently, it may also have resulted in the rising  
62 cases of amputations in this country. More data needs to be published to assess better the  
63 etiology, characteristics, and risk factors for amputation in this country. However, there is a lack  
64 of a National Registry for Amputations. This fact has increased the interest in studying the  
65 impact of etiology, characteristics, and clinical status on amputees. Sultan bin Abdul Aziz  
66 Humanitarian City (SBAHC), a tertiary care rehabilitation centre, adopted proper evaluation  
67 management and quality of life assessment for its clients where we conducted this study.  
68 Besides, identifying the etiology, characteristics, and risk factors for amputation will assist health  
69 care providers and patients in rehabilitation sessions in planning and establishing effective and  
70 timely interventions. The present study's purpose may also help improve rehabilitation services  
71 so that amputee patients can be functionally independent and productive members of their  
72 communities.

## 73 **Materials and Methods**

74 This investigation is a retrospective hospital-based study with 1409 amputee patients at Sultan  
75 bin Abdul Aziz Humanitarian City (SBAHC), Riyadh, Saudi Arabia, from June 2010 to June  
76 2020. All amputees' medical records were evaluated using a pre-designed case report form to  
77 determine the pattern of amputations and etiological factors. Inclusion criteria included all  
78 patients with amputations who visited outpatient limb loss clinics. The exclusion criteria  
79 included the patients whose medical records were incomplete during the study period regardless

80 of the level, site or type of amputation. Collected data included demographic variables, etiology,  
81 site, level, and type of amputations. In addition, the cohort distribution from different provinces,  
82 namely Central, Northern, Southern, Eastern, and Western, was collected in addition to patient  
83 nationality.

84 Out of the selected cohort, 618 patients were required to be admitted because of pre- and post-  
85 prosthetic rehabilitation. This cohort was used to assess functional independence using a  
86 functional independent measurement score (FIM Score) at admission and six months after  
87 discharge. Clinical evaluation in weight, height, BMI, and systolic/diastolic blood pressure was  
88 also collected from the patient's medical files. Progress with rehabilitation, if any, was recorded  
89 during the follow-up. The FIM instrument contains 18 items classified into six major scales: self-  
90 care, sphincter control, transfer, locomotion, communication, and social cognition. On each item,  
91 the patients rated their level of independence using a 1–7 scale, on which 1 means assistance was  
92 needed, and 7 means a person was entirely independent.

### 93 **Statistical Analysis**

94 The Pearson chi-square test was used to determine any significant relationship between the  
95 measured variables. The data were presented as the mean, standard deviation for continuous  
96 normal variables, and for continuous non-normal variables, the data were presented as median  
97 (Q1-Q3). The relationship between etiology, age, and level of amputation was calculated using  
98 the pivot graphs and tables. A P-value of 0.05 was considered significant. Each case was  
99 interviewed during admission and discharge using a self-reported version of the FIM instrument.  
100 Summing up responses to each item gave us a scale score ranging from several items to seven  
101 times the number of items, i.e., the total FIM score ranges from 18 to 126. FIM improvement (%)  
102 was calculated by subtracting FIM at admission from FIM at discharge, and this score served as  
103 an outcome measure in the present study.

### 104 **Results**

105 The demographic characteristics of the study subjects were presented in table 1. A total of 1409  
106 patients were recruited, out of which 75.6% were male and 24.4% were female. The patients'  
107 ages varied between 1 and 96 years, with a mean age of 45 years for males and 36 years for  
108 females. Out of the total population studied, Saudi nationals constituted 86.9%, and the rest were  
109 non-Saudis (13.1%). Most of the studied population (60.3%) was from the Central region of  
110 Saudi Arabia, followed by the Western (16.7%), Southern (11.4%), Eastern (7.5%) and Northern  
111 (4.2%) regions. Most amputees were affected by vascular and traumatic amputations (42.4% and  
112 36.9%, respectively), followed by congenital (14.4%) and infection/others (6.3%). The study  
113 cohort majorly consists of patients with a duration of amputation of 5 years (40.4%), followed by  
114 6–10 years (29.7%), 11–15 years (13.2%), > 20 years (10.8%), and then 16–20 years (6.0%).  
115 Among comorbidities, the most prevalent was diabetes (40.5%), followed by hypertension  
116 (26.3%), cardiac diseases (8.4%) and hyperlipidemia (5.3%).

117

118

119

120 When comparing the level of amputation with etiology, trans-tibial amputations were found to be  
121 the highest (22.6%), followed by trans-femoral amputations (14.1%) in the case of patients with  
122 vascular diseases. Among trauma patients, trans-femoral amputation was the highest (10.9%),  
123 followed by transtibial (9.6%). The amputation level among congenital cases was highest in the  
124 case of trans-radial (2.4%), followed by partial hand (1.8%) and trans-femoral (1.6%) (Figure 1).

125 When comparing the etiology of amputation with life span (Figure 2), we found that trauma-  
126 related amputation cases were highest in the age group between 21 to 30 years (69.2%) and  
127 lowest in people over 70 years of age (7%). The vascular related amputations were highest in the  
128 age group of 70 and above years (89.5%) and least in age-group of 0-10 years (3.9%).  
129 Congenital amputation were as expected most frequent in the age group 0–10 years (79.4%),  
130 followed by 11–20 years (37.5%), and was least in the age group 51–60 years (0.5%).

131 Admission and discharge FIM score data was presented in Table 2. There is a significant  
132 difference ( $p = 0.005$ ) between admission and discharge scores in self-care, transfer and  
133 locomotion (all  $p$ -values  $< 0.001$ ). Also, the overall FIM score improved 6-months post discharge  
134 as compared to the admission ( $p < 0.001$ ). FIM showed a maximum improvement in the case of  
135 locomotion (33.6%), followed by transfer (30.6%) and self-care (16.4%). An improvement of  
136 15.1% was also found in the total FIM score.

## 137 Discussion

138 Amputee incidence may differ not only from one country to another but also within the same  
139 country based on many factors: the degree of modernization, accessibility of medical and  
140 surgical care, and living standards. This study will give a better picture of the physical and  
141 pathological distribution of amputations in the five central provinces of Saudi Arabia. It is  
142 located in Riyadh, the capital of Saudi Arabia, so it is easily accessible to receive patients from  
143 the five major provinces of the Kingdom, namely: Central, Southern, Eastern, Western, and  
144 Northern Regions. This will be done to give a better picture of amputations' physical and  
145 pathological distribution. This study aimed to present our experiences with major limb  
146 amputations and compare the results to those of similar studies conducted in other regions of the  
147 world to emphasize the differences in the pattern and indications for amputations and suggest  
148 relevant preventive interventions.

149 This study's male predominance among amputees corresponds with other researchers that have  
150 found similar findings regardless of ethnicity and geographical distribution [10, 11]. This could  
151 be attributed to men having more severe peripheral artery diseases, higher smoking rates, and  
152 more susceptibility to road traffic accidents. On the other hand, estrogen and its effect on  
153 lowering vascular pathology may explain the lower incidence of amputation related to vascular  
154 disease [12]. The fact that diabetic patients have a 15-fold greater risk of amputation when  
155 coupled with the rising incidence of diabetes and vascular disease increases in lower limb  
156 amputation necessitates the importance of early detection, medical education, patient  
157 compliance, and reasonable glycemic control in this population.

158 Diabetic neuropathy that may lead to loss of sensation, abnormal gait, and deformity would  
159 increase the chance of foot pathology that increases the risk of lower limb amputation when  
160 coupled with vascular abnormality. In addition, the presence of chronic foot ulcers invites  
161 infection, especially deep wound and osteomyelitis infections that may end in amputation [13].  
162 In a study from South Africa and India, infection and ulcers were the most common causes of  
163 amputation in diabetic individuals. At the same time, ischemia was the most common cause in  
164 nondiabetic people, which was not the case in our studied cohort. This could be related to the  
165 better care provided to this cohort since medical care is free and provided by secondary and  
166 tertiary care centres [14, 15].

167 In the studied cohort, Trauma is the second observed cause of amputation, which is similar to  
168 what has been found in developed countries, contrary to what has been found in developing  
169 countries, where Trauma is the first cause of amputation [16]. These variations in amputation  
170 patterns reflect differences in comorbidities. It has been demonstrated that the risk of amputation  
171 rises as the number of comorbidities grows, which is the finding of this study and could provide  
172 a scientific basis for the higher incidence when compared with Trauma. SBAHC, being a tertiary  
173 care centre, receives most of its patients within five years of amputation, reflecting the efficiency  
174 of this hospital in providing services for such patients. Although Trauma was ranked second in  
175 this study, it was the most common reason for amputation in young adults in their productive and  
176 active age group.

177 In this study, the relationship between etiology and amputation level demonstrates the significant  
178 variations between amputation and surgical decisions by medical staff. Most of our amputations  
179 were in the lower limbs, with transtibial amputation the most common regardless of the etiology  
180 [17]. This data supports previous findings that lower limbs are wounded more frequently than  
181 upper extremities, and diabetic gangrene is more common in the lower extremities than in any  
182 other part of the body. However, other studies have found that trans-femoral amputation is more  
183 common than transtibial, which could reflect either the worst lower limb infection that mandates  
184 trans-femoral amputation or surgical attitude [18, 19]. When comparing Trauma to the degree of  
185 amputation, the transfemoral and transtibial amputations rates were nearly the same, at 9.6% and  
186 10.9%, respectively. That could be the effect of a wide age range in this cohort. According to  
187 research published in 1993, Trauma was the leading cause of lower limb amputation in Saudi  
188 Arabia (52.9%). The most common location of amputation was the trans-tibia, followed by the  
189 trans-femoral, trans-radial, partial hand, and trans-humeral [20]. Since then, there has been no  
190 data in PubMed about amputations in this country. This could be explained by the increasing  
191 incidence of comorbidities, especially diabetes, and the strengthening of safety belt rules in  
192 society [21].

193 Different age groups in our studied population showed variance in etiology. In our study, trauma-  
194 related amputations were most common in the age group of 20 to 40 years. This is consistent  
195 with a WHO report signalling that road traffic accidents are among the top causes of death in  
196 those aged 15 to 29 years old, as the first few months after receiving a license are extremely  
197 hazardous [22]. When considering the influence of age on amputations and its relationship to  
198 etiology, vascular disease is the most common cause. This was observed in the 3rd and 4th  
199 decades of life and was identical to the reports from other developed and developing countries'  
200 studies [23].



201 Consequently, vascular disease-related amputation was most common in older people aged over  
202 60 years. Furthermore, older people are more likely to have more than one ailment that may  
203 result in amputation due to vascular etiology [24]. Congenital limb deficiency, on the other hand,  
204 accounted for 79.4% of lower limb deficiency in children under the age of 10 years in this study,  
205 compared to 67% in the Krebs and Fishman study [25], 32% in the Yigiter et al. study [26], and  
206 73.3% in the Boonstra et al. study [27]. This could be at the expense of trauma-related limb loss  
207 based on strengthening children's car safety rules. In addition to data from tertiary centres  
208 receiving patients from all over the Kingdom, These demographic parameters of children with  
209 limb deficits showed a high degree of consistency throughout the literature.

210 There was a significant difference between FIM scores at admission and discharge and a total  
211 FIM gain during the hospitalization. On follow-up visits, we saw a considerable improvement in  
212 the total FIM score and its motor and transfer subscales. The average total FIM scores for  
213 admission and discharge were 89.811.2 and 107.51.1, respectively. An FIM score of greater than  
214 108 indicates home independence [28]. On six-month follow-up visits, individuals in this study  
215 achieved this independence degree. This improvement was most noticeable in the self-care,  
216 transfer, and locomotion categories. The results showed an improvement in self-care, transfer,  
217 and locomotion in the FIM scores between admission and discharge, comparable with the  
218 findings of the Hall et al. study [29]. The research found that advances in the motor domain were  
219 much higher than gains in the cognitive domain, as the cognitive score was not the scope of this  
220 study, in addition to the fact that such patient categories are not associated with mental or  
221 cognitive defects.

222 This study's strength comes from being conducted in the largest tertiary rehabilitation centre in  
223 the country, which was able to represent amputees nationwide and covers all age spectrums. The  
224 second strength is that amputees in this institution are subject to a multidisciplinary approach that  
225 would give better clinical, physical and mental assessment, as shown in this study. Finally,  
226 although this study was limited to being a retrospective study and receiving patients after five  
227 years, that would not provide data related to immediate amputation outcome.

## 228 **Conclusion**

229 Vascular pathology caused by chronic illnesses is the key risk factor for amputation,  
230 necessitating primary and secondary preventive efforts. If patients and caregivers were better  
231 informed and instructed about post-amputation objectives, they would be more likely to adhere  
232 to professionally prescribed rehabilitation programs. A multidisciplinary team approach, in-depth  
233 understanding of the functional impacts of amputation, and a comprehensive and detailed  
234 examination of the patients and their surroundings should serve as the cornerstone for post-  
235 amputation follow-up programs. Seatbelt use can considerably reduce amputations caused by  
236 road traffic accidents, which are the second most common cause of amputation. This study may  
237 raise awareness among healthcare providers about the need for primary and secondary preventive  
238 strategies for limb loss.

239

240

241

242

243

244

245

246

## 247 **Author Contributions**

248 Conceptualization, E.M.S.; Methodology, M.T.S, A.Z., M.B.; Data curation, I.S.; Writing—  
249 original draft preparation, I.S.; Writing—review and editing, E.M.S., M.T.S., M.B.; Supervision,  
250 E.M.S., K.M.A. All authors have read and agreed to the published version of the manuscript.

## 251 **Acknowledgement**

252 The authors would like to acknowledge the staff of the research center, nurses from the surgical  
253 department, and the department of health information system (HIS) at SBAHC.

## 254 **Conflict Of Interest**

255 The authors declare that there is no conflict of interest.

## 256 **Funding**

257 This research received no funding from any external organization.

## 258 **Institutional Review Board Statement**

259 The study design and protocol was approved by the Ethics Committee for Scientific  
260 Research at SBAHC, Riyadh Saudi Arabia ,under the IRB No.03-2019-IRB with study  
261 code:01/SBACH/RH/2019.

## 262 **Informed Consent Statement**

263 Informed consent was obtained from all subjects involved in the study.

## 264 **References**

1. Moxey P, Gogalniceanu P, Hinchliffe R, et al.: Lower extremity amputations-a review of global variability in incidence. *Diabetic Medicine*. 2011, 28:1144-53. 10.1111/j.1464-5491.2011.03279.<https://doi.org/10.1111/j.1464-5491.2011.03279.x>.PMid:21388445
2. Ahmad N, Thomas GN, Gill P and Torella F: The prevalence of major lower limb amputation in the diabetic and nondiabetic population of England 2003-2013. *Diabetes and Vascular Disease Research*. 2016, 13:348-53. 10.1177/1479164116651390. <https://doi.org/10.1177/1479164116651390>. PMid:27334482
3. Ziegler-Graham K, MacKenzie EJ, Ephraim PL, Travison TG and Brookmeyer R: Estimating the prevalence of limb loss in the United States: 2005 to 2050. *Archives of physical medicine and rehabilitation*. 2008, 89:422-9. 10.1016/j.apmr.2007.11.005.<https://doi.org/10.1016/j.apmr.2007.11.005>.PMid:18295618
4. Ghosh Das P and Lahiri S: Prevalence and aetiology of amputation in Kolkata, India: A retrospective analysis. *Hong Kong Physiother J*. 2013, 31:36-40. 10.1016/j.hkpj.2012.12.002.<https://doi.org/10.1016/j.hkpj.2012.12.002>

5. Klaphake S, de Leur K, Mulder PG, et al.: Mortality after major amputation in elderly patients with critical limb ischemia. *Clinical interventions in aging*. 2017, 12:1985. 10.2147/CIA.S137570. <https://doi.org/10.2147/CIA.S137570>. PMID:29200838 PMCID:PMC5702177
  6. Johannesson A, Larsson G-U, Ramstrand N, Turkiewicz A, Wiréhn A-B and Atroshi I: Incidence of lower-limb amputation in the diabetic and nondiabetic general population: a 10-year population-based cohort study of initial unilateral and contralateral amputations and reamputations. *Diabetes care*. 2009, 32:275-80. 10.2337/dc08-1639 <https://doi.org/10.2337/dc08-1639>. PMID:19001192 PMCID:PMC2628693
  7. Nativel M, Potier L, Alexandre L, et al.: Lower extremity arterial disease in patients with diabetes: a contemporary narrative review. *Cardiovascular diabetology*. 2018, 17:1-14. 10.1186/s12933-018-0781-1 <https://doi.org/10.1186/s12933-018-0781-1>. PMID:30352589 PMCID:PMC6198374
  8. Alwin Robert A and Al Dawish MA: Microvascular complications among patients with diabetes: An emerging health problem in Saudi Arabia. *Diabetes and Vascular Disease Research*. 2019, 16:227-35. 10.1177/1479164118820714. <https://doi.org/10.1177/1479164118820714>. PMID:30599757
  9. Abdulaziz Al Dawish M, Alwin Robert A, Braham R, et al.: Diabetes mellitus in Saudi Arabia: a review of the recent literature. *Current diabetes reviews*. 2016, 12:359-68. 10.2174/1573399811666150724095130 <https://doi.org/10.2174/1573399811666150724095130>. PMID:26206092
  10. Carmona GA, Hoffmeyer P, Herrmann F, et al.: Major lower limb amputations in the elderly observed over ten years: the role of diabetes and peripheral arterial disease. *Diabetes & metabolism*. 2005, 31:449-54. 10.1016/S1262-3636(07)70215-X. [https://doi.org/10.1016/S1262-3636\(07\)70215-X](https://doi.org/10.1016/S1262-3636(07)70215-X)
  11. Lim TS, Finlayson A, Thorpe JM, et al.: Outcomes of a contemporary amputation series. *ANZ journal of surgery*. 2006, 76:300-5. 10.1111/j.1445-2197.2006.03715.x. <https://doi.org/10.1111/j.1445-2197.2006.03715.x> PMID:16768686
  12. Jonasson JM, Ye W, Sparén P, Apelqvist J, Nyrén O and Brismar K: Risks of nontraumatic lower-extremity amputations in patients with type 1 diabetes: a population-based cohort study in Sweden. *Diabetes care*. 2008, 31:1536-40. 10.2337/dc08-0344. <https://doi.org/10.2337/dc08-0344>. PMID:18443192 PMCID:PMC2494662
  13. Giurato L, Meloni M, Izzo V and Uccioli L: Osteomyelitis in diabetic foot: a comprehensive overview. *World journal of diabetes*. 2017, 8:135. 10.4239/wjd.v8.i4.135. <https://doi.org/10.4239/wjd.v8.i4.135>. PMID:28465790 PMCID:PMC5394733
  14. Dunbar GL, Hellenberg DA and Levitt NS: Diabetes mellitus and non-traumatic lower extremity amputations in four public sector hospitals in Cape Town. South Africa, during. 2009-2010, 2015:10536. 10.7196/SAMJ.2015.v105i12.9276. <https://doi.org/10.7196/SAMJ.2015.v105i12.9276>. PMID:26792165
  15. . Almohammadi AA, Alnashri MM, Abdulrahman T Harun R, Alsamiri SM, Alkhatieb MT. Pattern and type of amputation and mortality rate associated with diabetic foot in Jeddah, Saudi Arabia: A retrospective Cohort Study. *Ann Med Surg (Lond)*. 2021 Dec 8;73:103174. <https://doi.org/10.1016/j.amsu.2021.103174>. PMID:34976392 PMCID:PMC8689050
- doi: 10.1016/j.amsu.2021.103174. PMID: 34976392; PMCID: PMC8689050.  
<https://doi.org/10.1016/j.amsu.2021.103174>. PMID:34976392 PMCID:PMC8689050
16. Sabzi Sarvestani A, Taheri Azam A. Amputation: a ten-year survey. *Trauma Mon*. 2013 Dec;18(3):126-9. doi:



10.5812/traumamon.11693. Epub 2013 Oct 14. PMID: 24350170; PMCID: PMC3864397.  
<https://doi.org/10.5812/traumamon.11693>. PMid:24350170 PMCID:PMC3864397

17. Essoh S, Bamba I, Dje VB, Traore A and Lambin Y: Limb amputations in adults in an Ivorian Teaching Hospital. Nigerian Journal of Orthopaedics and Trauma. 2007, 6:61-3. 10.4314/njotra.v6i2.29299  
<https://doi.org/10.4314/njotra.v6i2.29299>

18. Kidmas A, Nwadiaro C and Igun G: Lower limb amputation in Jos, Nigeria. East African medical journal. 2004, 81:427-9. 10.4314/eamj.v81i8.9205. 10.4314/njotra.v6i2.29299.<https://doi.org/10.4314/eamj.v81i8.9205>

19. Vickie R. Driver, Matteo Fabbi, Lawrence A. Lavery, Gary Gibbons, The costs of diabetic foot: The economic case for the limb salvage team, Journal of Vascular Surgery, Volume 52, Issue 3, Supplement, 2010, Pages 17S-22S, ISSN 0741-5214, <https://doi.org/10.1016/j.jvs.2010.06.003>. <https://doi.org/10.1016/j.jvs.2010.06.003>  
PMid:20804928

20. Mariam TG, Alemayehu A, Tesfaye E, Mequannt W, Temesgen K, Yetwale F, Limenih MA. Prevalence of Diabetic Foot Ulcer and Associated Factors among Adult Diabetic Patients Who Attend the Diabetic Follow-Up Clinic at the University of Gondar Referral Hospital, North West Ethiopia, 2016: Institutional-Based Cross-Sectional Study. J Diabetes Res. 2017;2017:2879249. doi: 10.1155/2017/2879249. Epub 2017 Jul 16. PMID: 28791310; PMCID: PMC5534295. <https://doi.org/10.1155/2017/2879249>. PMid:28791310 PMCID:PMC5534295

21. Al-Wathinani AM, Schwebel DC, Al-Nasser AH, et al.: The prevalence of risky driving habits in Riyadh, Saudi Arabia. Sustainability. 13, 7338:10.3390/su13137338. 10.3390/su13137338.<https://doi.org/10.3390/su13137338>

22. Monaro S, West S, Gullick J. Patient outcomes following lower leg major amputations for peripheral arterial disease: A series review. J Vasc Nurs. 2017 Jun;35(2):49-56. doi: 10.1016/j.jvn.2016.10.003. PMID: 28527727. <https://doi.org/10.1016/j.jvn.2016.10.003>. PMid:28527727

23. Abbas AD, Musa AM. Changing pattern for extremity amputations in University of Maiduguri Teaching Hospital, Nigeria. Niger J Med. 2007 Oct-Dec;16(4):330-3. doi: 10.4314/njm.v16i4.37332. PMID: 18080590. <https://doi.org/10.4314/njm.v16i4.37332>. PMid:18080590

24. Fried LP, Ferrucci L, Darer J, Williamson JD and Anderson G: Untangling the concepts of disability, frailty, and comorbidity: implications for improved targeting and care. The Journals of Gerontology Series A: Biological Sciences and Medical Sciences. 2004, 59:255-63. 10.1093/gerona/59.3.M255. <https://doi.org/10.1093/gerona/59.3.M255>. PMid:15031310

25. Krebs M, Halvorsen RB, Fishman IJ and Santos-Mendoza N: Prevention of urinary tract infection during intermittent catheterization. The Journal of urology. 1984, 131:82-5. 10.1016/S0022-5347(17)50212-8  
[https://doi.org/10.1016/S0022-5347\(17\)50212-8](https://doi.org/10.1016/S0022-5347(17)50212-8)

26. Yiğitler K, Ülger Ö, Şener G, Akdoğan S, Erbahçeci F and Bayar K: Demography and function of children with limb loss. Prosthetics and orthotics international. 2005, 29:131-8. 10.1080/03093640500199703  
<https://doi.org/10.1080/03093640500199703>. PMid:16281722

27. Boonstra A, Rijnders L, Groothoff J and Eisma W: Children with congenital deficiencies or acquired amputations of the lower limbs: functional aspects. Prosthetics and orthotics international. 2000, 24:19-10.1080/03093640008726518. <https://doi.org/10.1080/03093640008726518>. PMid:10855435

28. Si Larbi MT, Al Mangour W, Saba I, Al Naqeb D, Faisal ZS, Omar S, Ibrahim F. Ischemic and Non-ischemic Stroke in Young Adults - A Look at Risk Factors and Outcome in a Developing Country. Cureus. 2021 Aug

11;13(8):e17079. doi: 10.7759/cureus.17079. PMID: 34527467; PMCID: PMC8432428.  
<https://doi.org/10.7759/cureus.17079>\_PMid:34527467 PMCID:PMC8432428

29.Hall KM, Cohen ME, Wright J, Call M and Werner P: Characteristics of the Functional Independence Measure in traumatic spinal cord injury. Archives of physical medicine and rehabilitation. 1999, 80:1471-6. 10.1016/S0003-9993(99)90260-5.[https://doi.org/10.1016/S0003-9993\(99\)90260-5](https://doi.org/10.1016/S0003-9993(99)90260-5)

265 **Tables:**

266 **Table 1.** Demographic Characteristics of study subjects

| <b>Total</b>                       |                | <b>1409</b>  | <b>Male (1066)</b> | <b>Female (343)</b> | <b>p-value</b> |
|------------------------------------|----------------|--------------|--------------------|---------------------|----------------|
| Age Mean (SD)                      |                | 43 (21)      | 45 (20.8)          | 36 (20.0)           | < 0.001        |
| Nationality N (%)                  | Saudi          | 1224 (86.8)  | 920 (75.1)         | 304 (24.9)          | < 0.001        |
|                                    | Non-Saudi      | 185 (13.1)   | 146 (78.9)         | 39 (21.1)           | < 0.001        |
| Province N (%)                     | Central        | 849 (60.2)   | 650 (76.5)         | 199 (23.5)          | < 0.001        |
|                                    | Northern       | 59 (4.1)     | 37 (62.7)          | 22 (37.3)           | 0.006          |
|                                    | Southern       | 160 (11.3)   | 126 (78.7)         | 34 (21.3)           | < 0.001        |
|                                    | Western        | 235 (16.6)   | 181 (77.1)         | 54 (22.9)           | < 0.001        |
|                                    | Eastern        | 106 (7.5)    | 72 (67.9)          | 34 (32.1)           | < 0.001        |
| Etiology N (%)                     | Trauma         | 519 (36.8)   | 425 (81.8)         | 94 (18.2)           | < 0.001        |
|                                    | Vascular       | 597 (42.3)   | 479 (80.2)         | 118 (19.8)          | < 0.001        |
|                                    | Congenital     | 204 (14.4)   | 109 (53.4)         | 95 (46.6)           | 0.163          |
|                                    | Infection      | 89 (6.3)     | 53 (59.5)          | 36 (40.5)           | 0.01           |
| Duration of amputation N (%)       | ≤5             | 566 (40.3)   | 447 (78.9)         | 119 (21.1)          | <0.001         |
|                                    | 6 - 10         | 417 (29.6)   | 329 (78.8)         | 88 (21.2)           | < 0.001        |
|                                    | 11-15          | 186 (13.2)   | 137 (73.6)         | 49 (26.4)           | < 0.001        |
|                                    | 16 - 20        | 84 (5.9)     | 55 (65.4)          | 29 (34.6)           | < 0.001        |
|                                    | >20            | 152 (10.7)   | 95 (62.5)          | 57 (37.5)           | < 0.001        |
| Comorbidity N (%)                  | Diabetes       | 570 (40.4)   | 468 (82.1)         | 102 (17.9)          | < 0.001        |
|                                    | Hypertension   | 370 (26.2)   | 301 (81.5)         | 69 (18.5)           | < 0.001        |
|                                    | Hyperlipidemia | 74 (5.2)     | 63 (85.1)          | 11 (14.9)           | < 0.001        |
|                                    | Cardiac        | 118 (8.3)    | 102 (86.4)         | 16 (13.6)           | < 0.001        |
|                                    | Others         | 277 (19.6)   | 193 (69.6)         | 84 (30.4)           | < 0.001        |
| Weight Mean (SD)                   |                | 72.5 (32.4)  | 72.4 (32.4)        | 62.8 (31.7)         | < 0.001        |
| Height Mean (SD)                   |                | 158.5 (54.6) | 158.50 ( 54.6)     | 146.5 (48.3)        | < 0.001        |
| BMI Mean (SD)                      |                | 30.2 (12.5)  | 30.58 (12.5)       | 26.9 (12.3)         | 0.03           |
| Systolic Blood Pressure Mean (SD)  |                | 125.9 (42.5) | 128.9 ( 42.5)      | 120.6 (49.1)        | < 0.001        |
| Diastolic Blood Pressure Mean (SD) |                | 76.3 (24.8)  | 76.3 (24.8)        | 74.5 (22.7)         | 0.47           |

267 **Note:** Data is presented as prevalence (%). The difference between the groups is tested by Chi-square test. P<0.05 is  
 268 considered significant.

269  
270  
271  
272  
273  
274  
275

276 **Table 2.** Patient's functional status according to Functional Independence Measurement (FIM)  
277 Score value from admission to discharge

| FIM Scale<br>Mean (SD) | Admission  | Discharge   | P       | Max<br>Score | Admission<br>(% score) | Discharge<br>(% score) | Improvement<br>(%) |
|------------------------|------------|-------------|---------|--------------|------------------------|------------------------|--------------------|
| Self-care              | 29.6 (0.5) | 36.6 (0.3)  | <0.001  | 42           | 71.4                   | 87.8                   | 16.4               |
| Sphincter-Control      | 12.5 (0.2) | 12.5 (0.2)  | 0.34    | 14           | 88.0                   | 91.8                   | 3.8                |
| Transfer               | 11.0 (0.4) | 17.3 (0.2)  | < 0.001 | 21           | 52.6                   | 83.2                   | 30.6               |
| Locomotion             | 6.4 (0.3)  | 10.8 (0.2)  | < 0.001 | 14           | 45.9                   | 79.5                   | 33.6               |
| Communication          | 13.6 (0.1) | 13.7 (0.1)  | 0.19    | 14           | 97.6                   | 98.8                   | 1.2                |
| Social-Cognition       | 20.3 (0.1) | 20.4 (0.1)  | 0.29    | 21           | 97.0                   | 97.9                   | 0.9                |
| Total FIM              | 89.8 (1.2) | 107.5 (1.1) | < 0.001 | 126          | 74.4                   | 89.5                   | 15.1               |

278 **Note:** Data is presented as prevalence (%). The difference between the groups is tested by Chi-square test. P<0.05 is  
279 considered significant.

280  
281  
282  
283

**Legends to Figures:**

**Figure 1.** Level of amputation in relation to etiology.

**Figure 2.** Etiology of amputation in relation to life span.

Level of Amputation in relation to Etiology

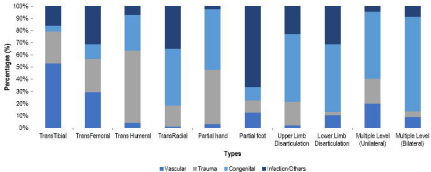

# Etiology of amputation in relation to life span

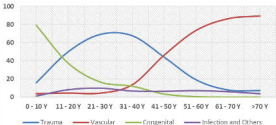

Source: https://www.medrxiv.org/content/10.1101/2022.03.09.22272172.full.pdf
